# Supplementary material
Source: MDPI journal article supplement (https://www.mdpi.com/2073-4433/15/3/310)

# Supplementary Materials

## Thunderstorms Near the North Pole

It turned out that the lightning activity statistics are determined by individual thunderstorms.

We simulated the state of the atmosphere during these storms with WRF-ARW.

First figure in each section: 500 hPa geopotential height and horizontal wind. Left to right: temperature at 2 meters, maximum radar reflectivity, WLLN data from previous 2 and following 1 hours.

11 August 2019: 00:00, 03:00, 06:00, 09:00, 12:00, 15:00 UTC:

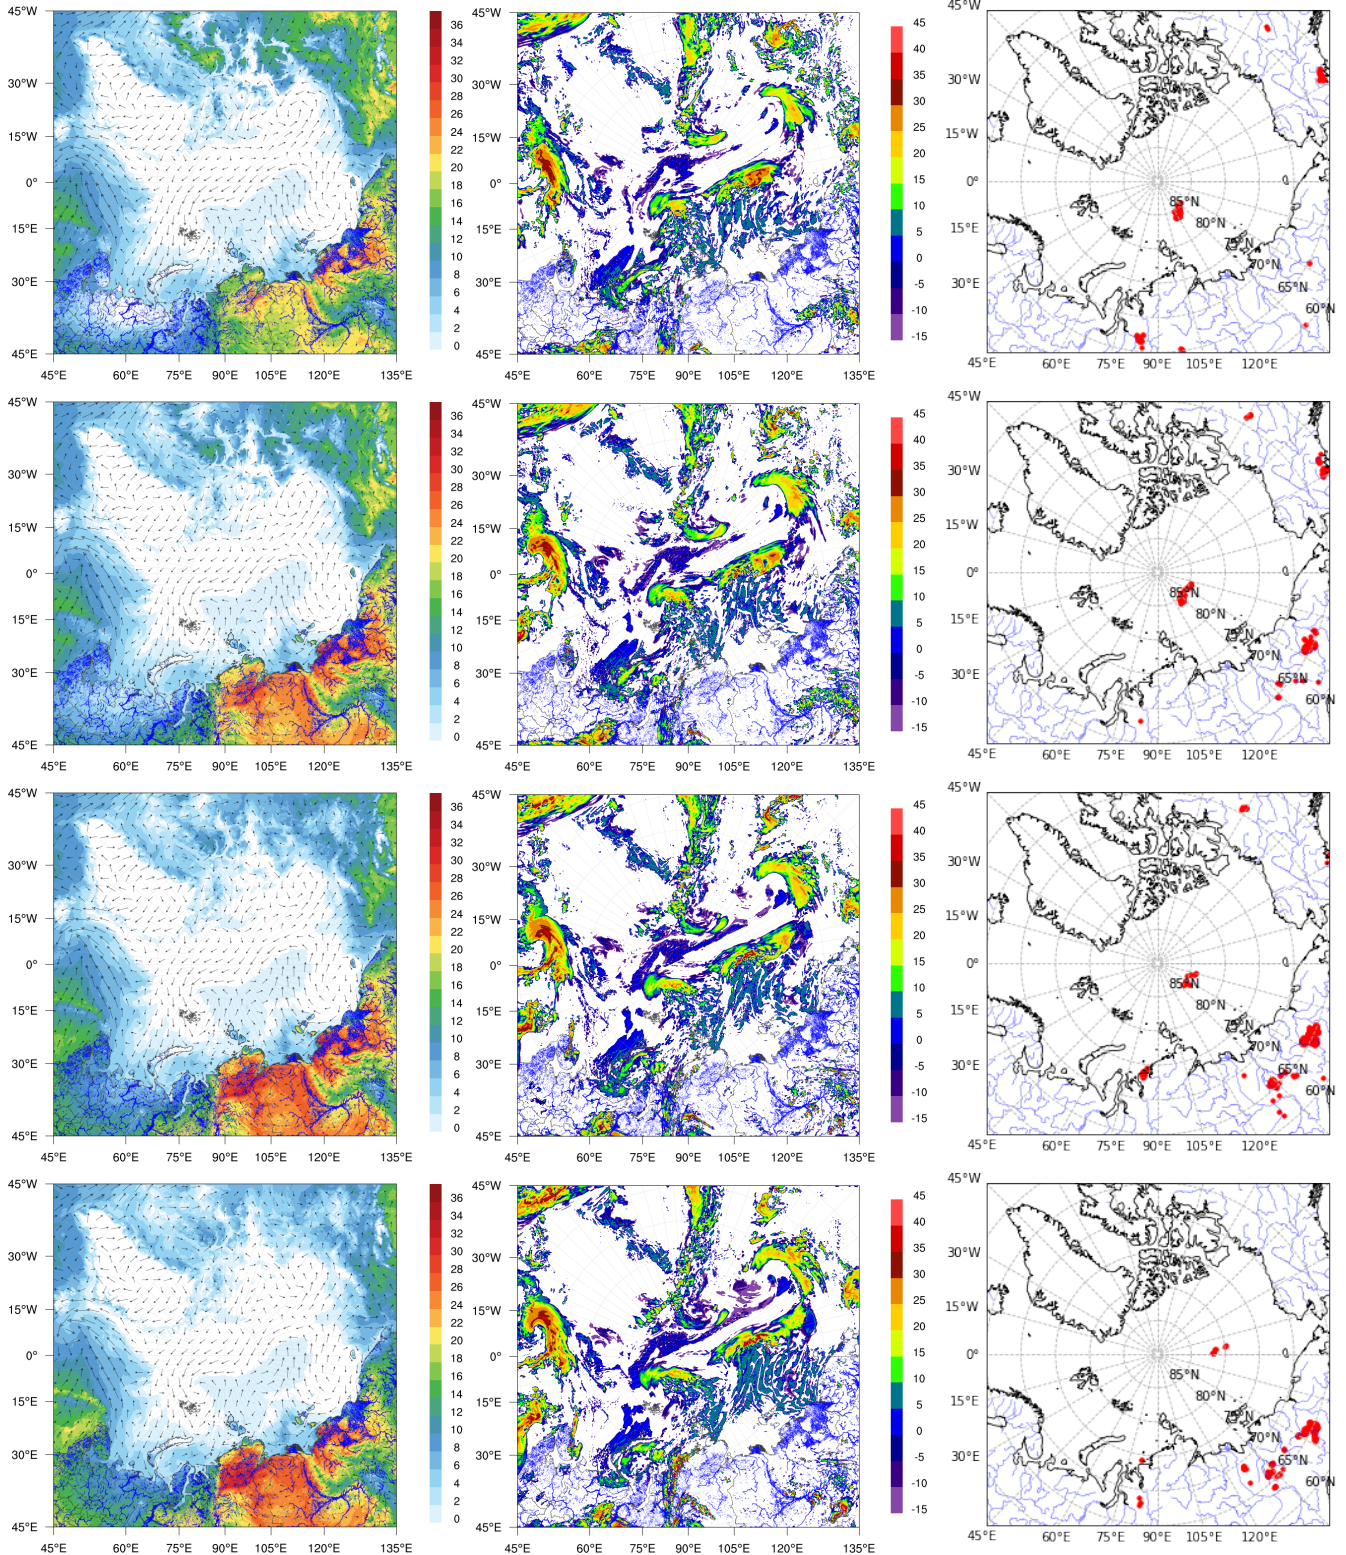



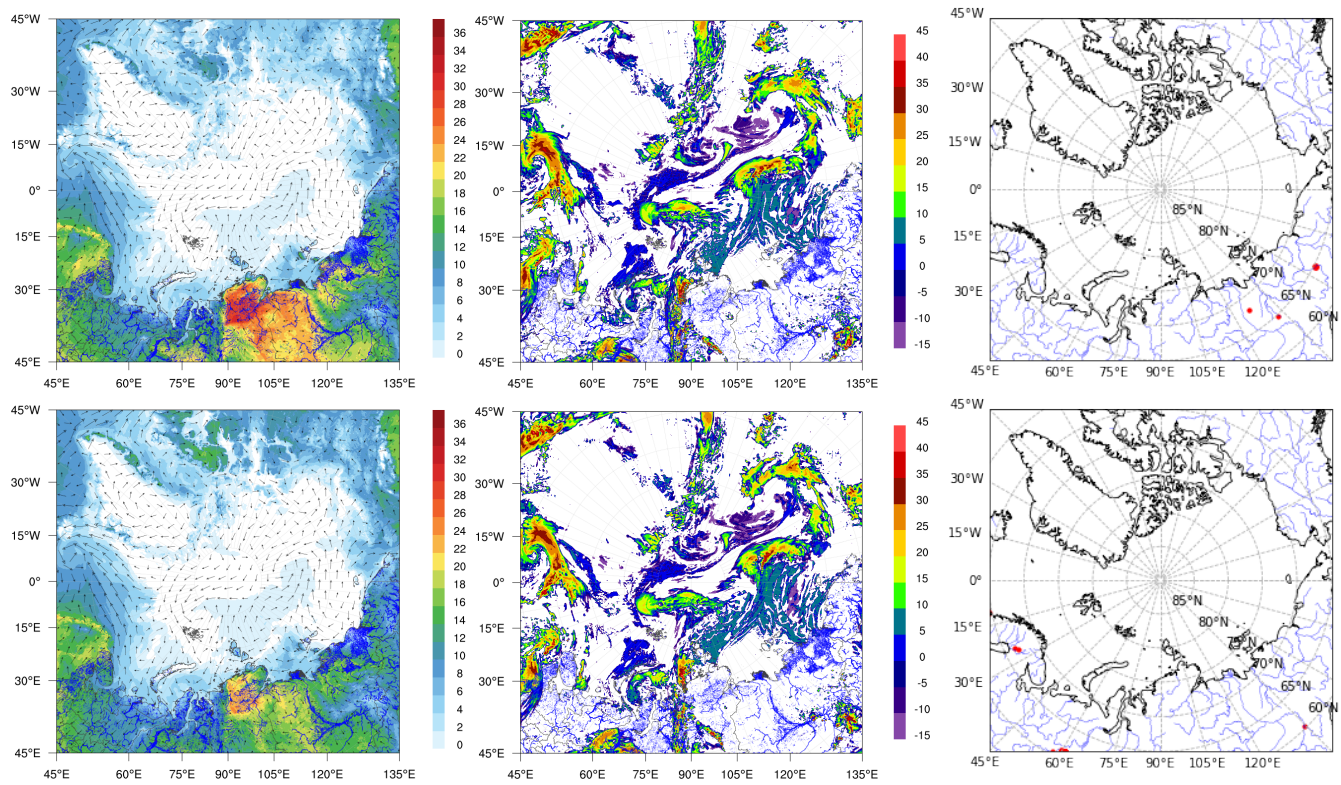

Height of 500 hPa pressure level at 9:00 UTC 11 August 2019. Other moments look quite similar.

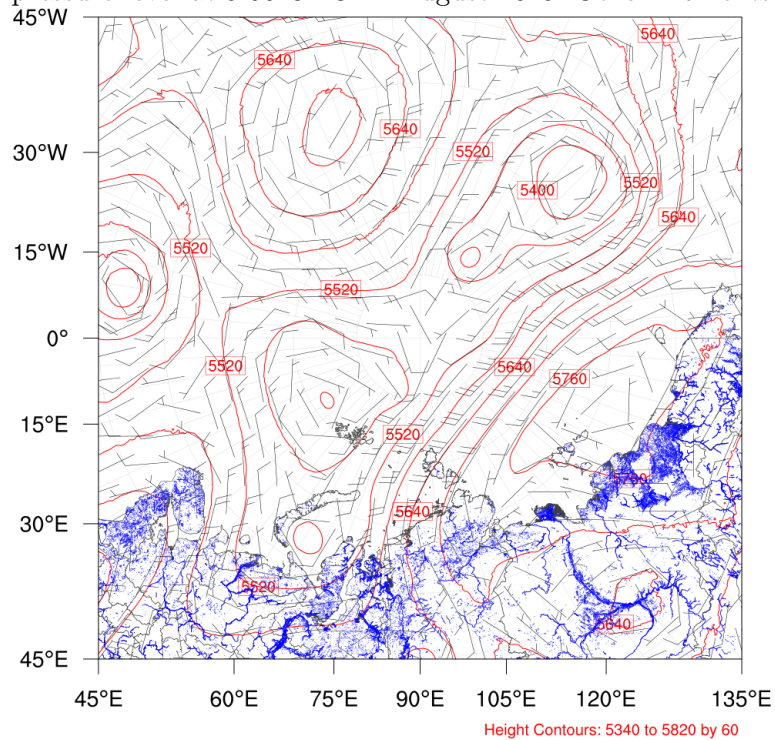

Height Contours: 5340 to 5820 by 60



1 July 2020: 00:00, 03:00, 06:00, 09:00, 12:00, 15:00 UTC:

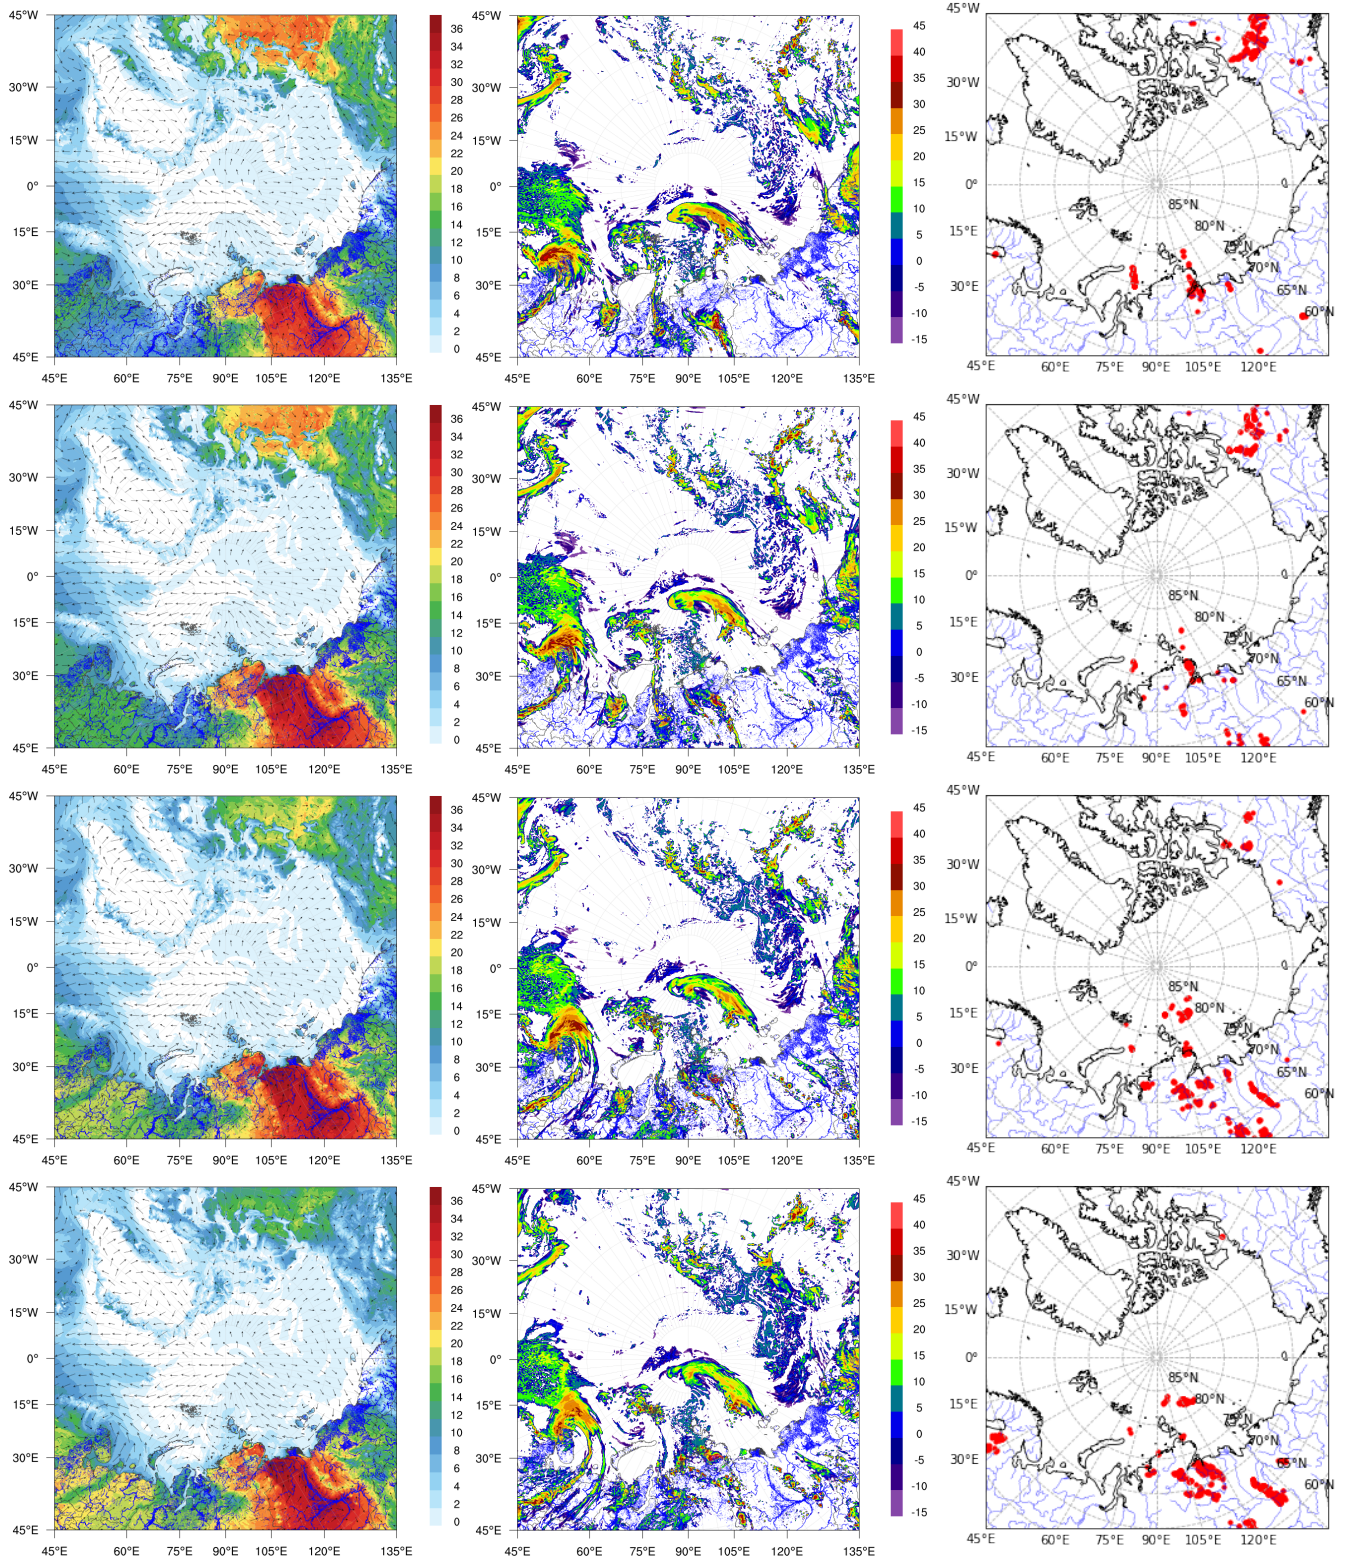



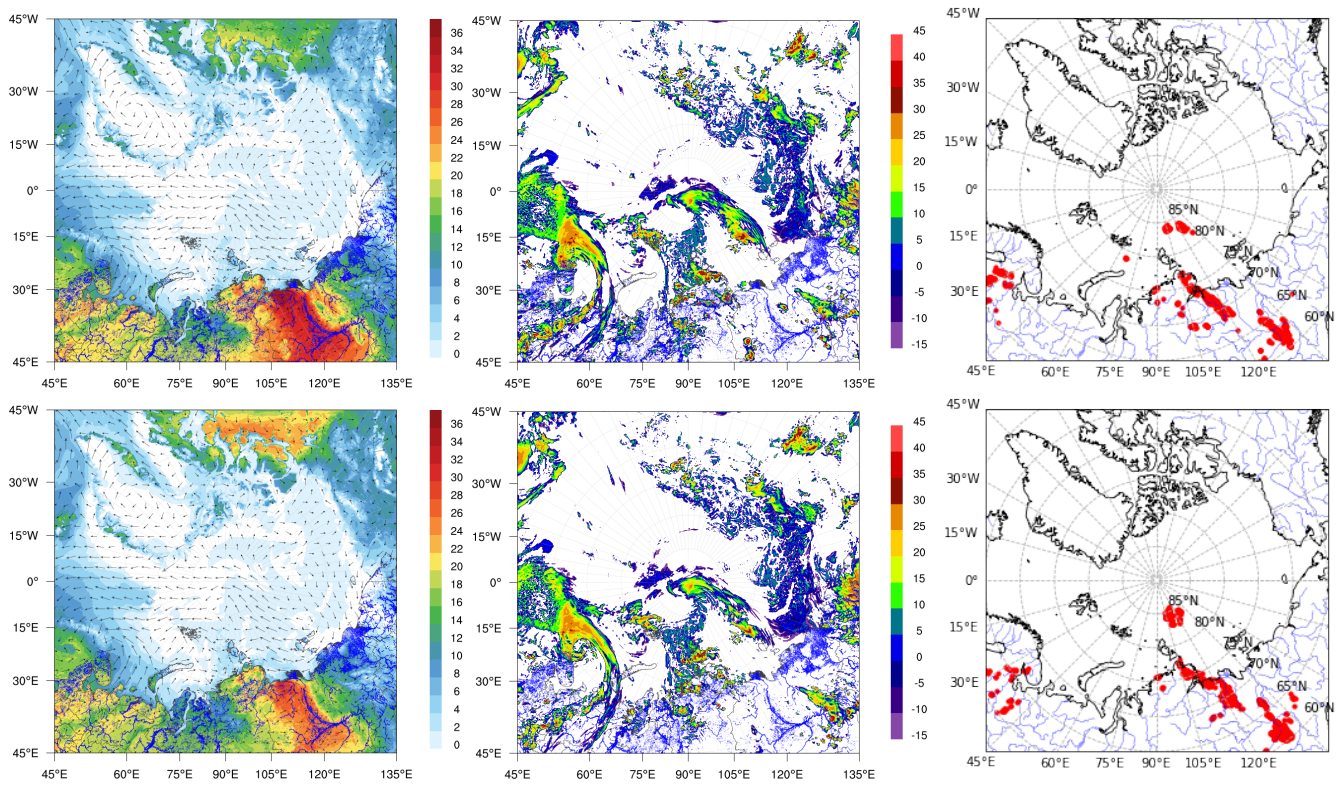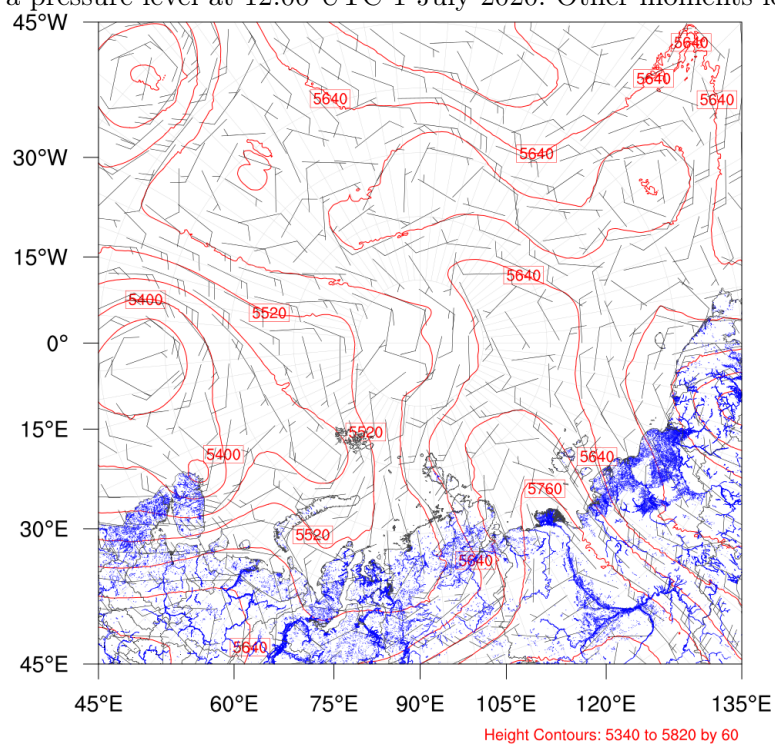



28 July 2021: 06:00, 09:00, 12:00, 15:00, 18:00, 21:00 UTC:

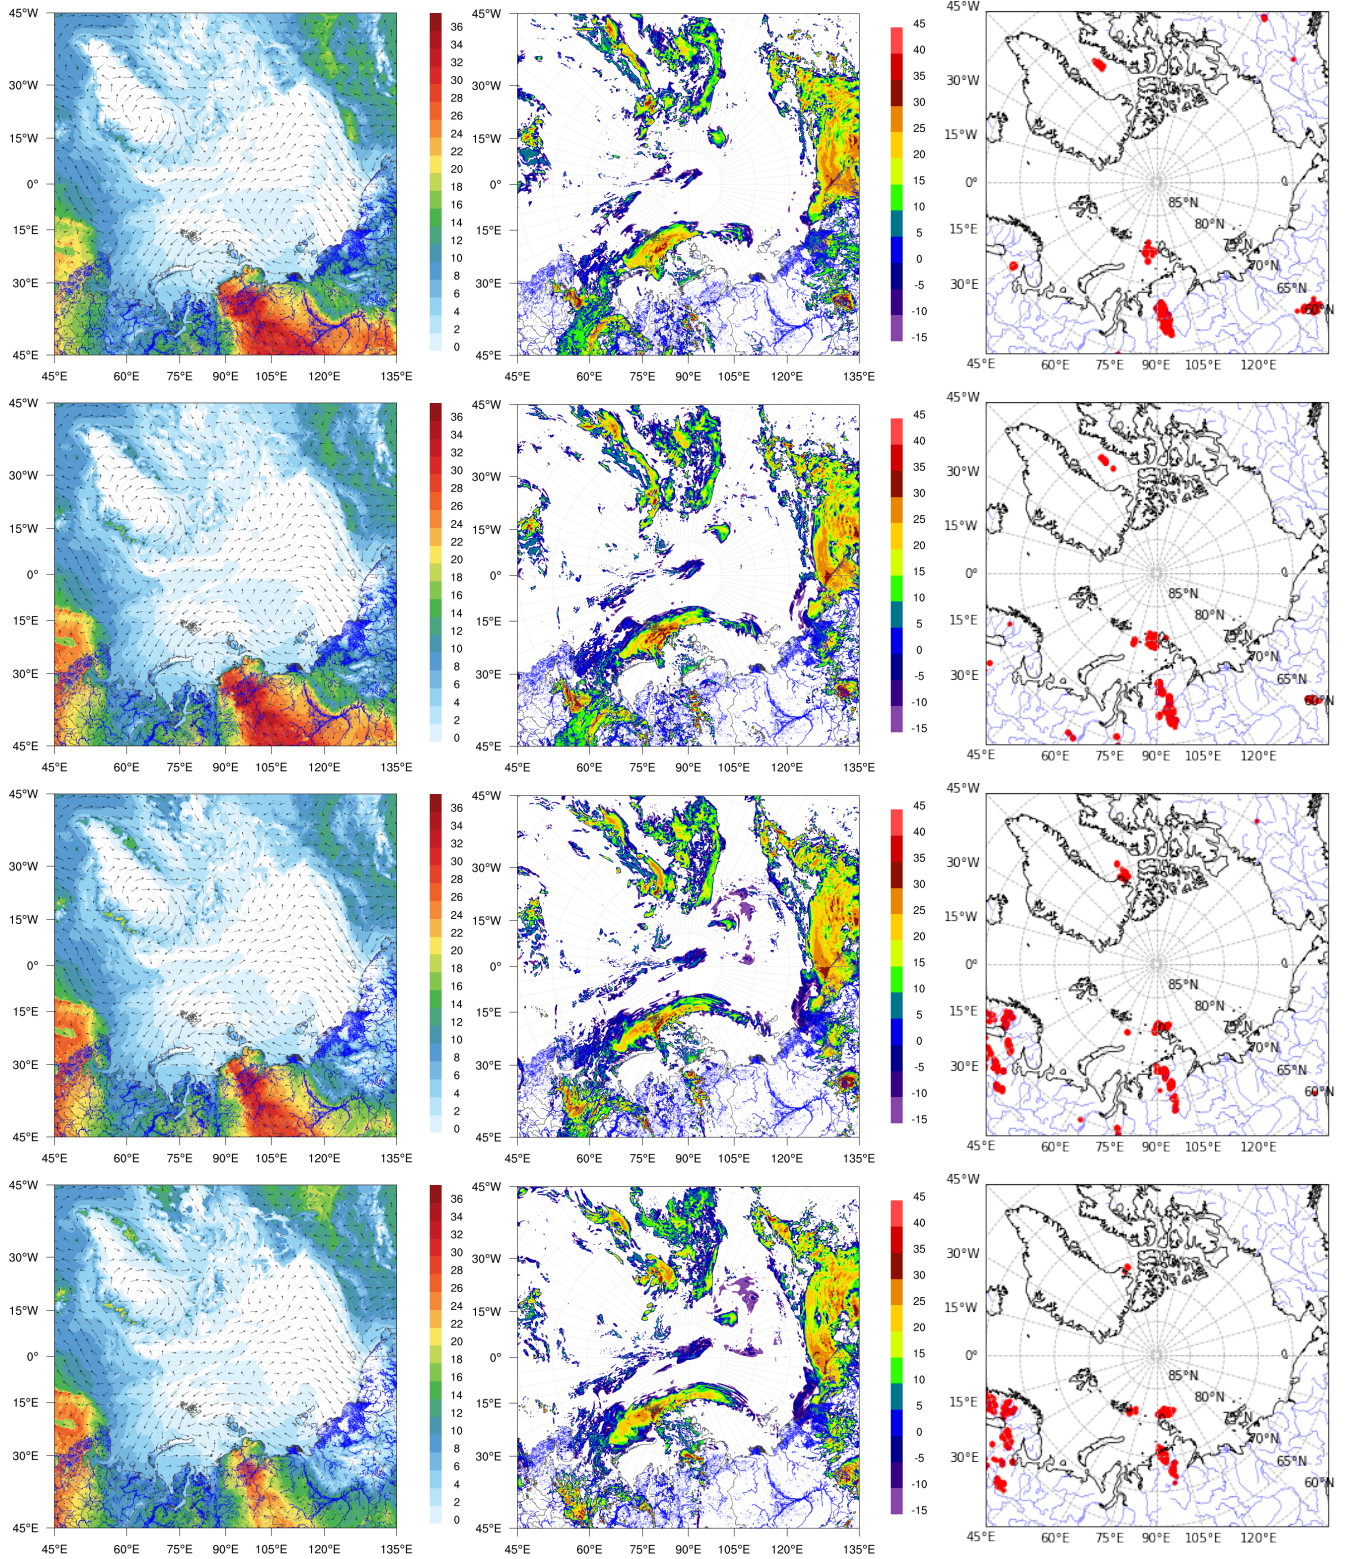



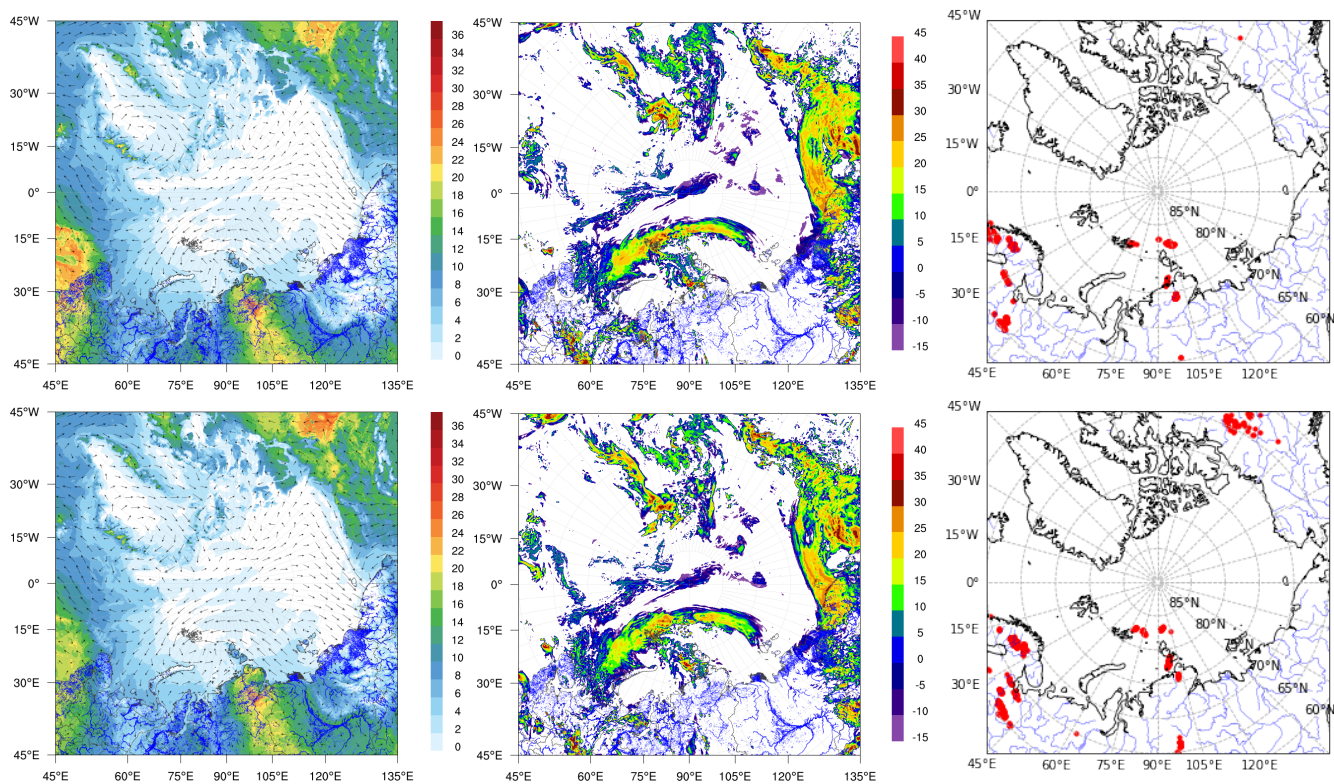

Height of 500 hPa pressure level at 12:00 UTC 28 July 2021. Other moments look quite similar.

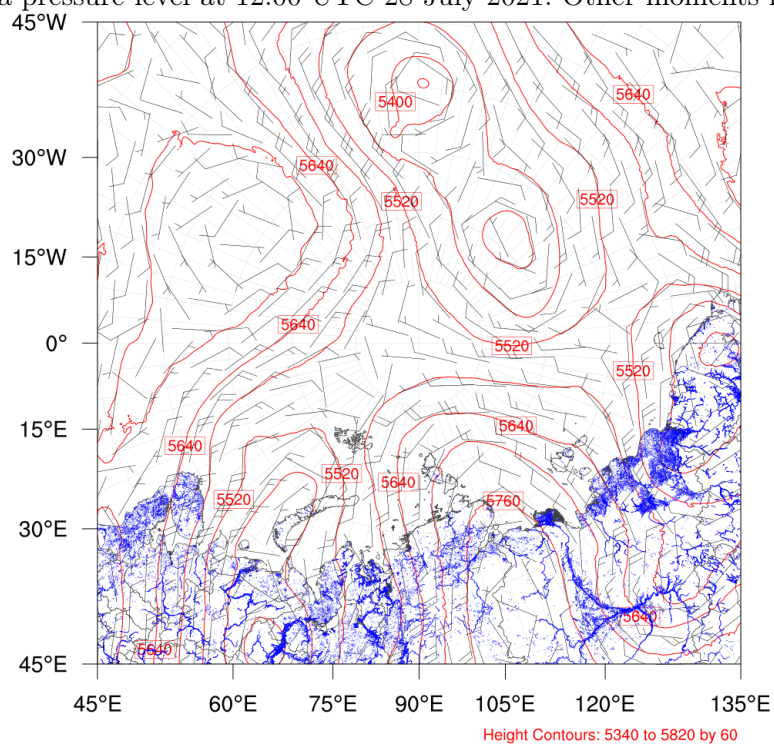



2 August 2023: 06:00, 09:00, 12:00, 15:00, 18:00 UTC:

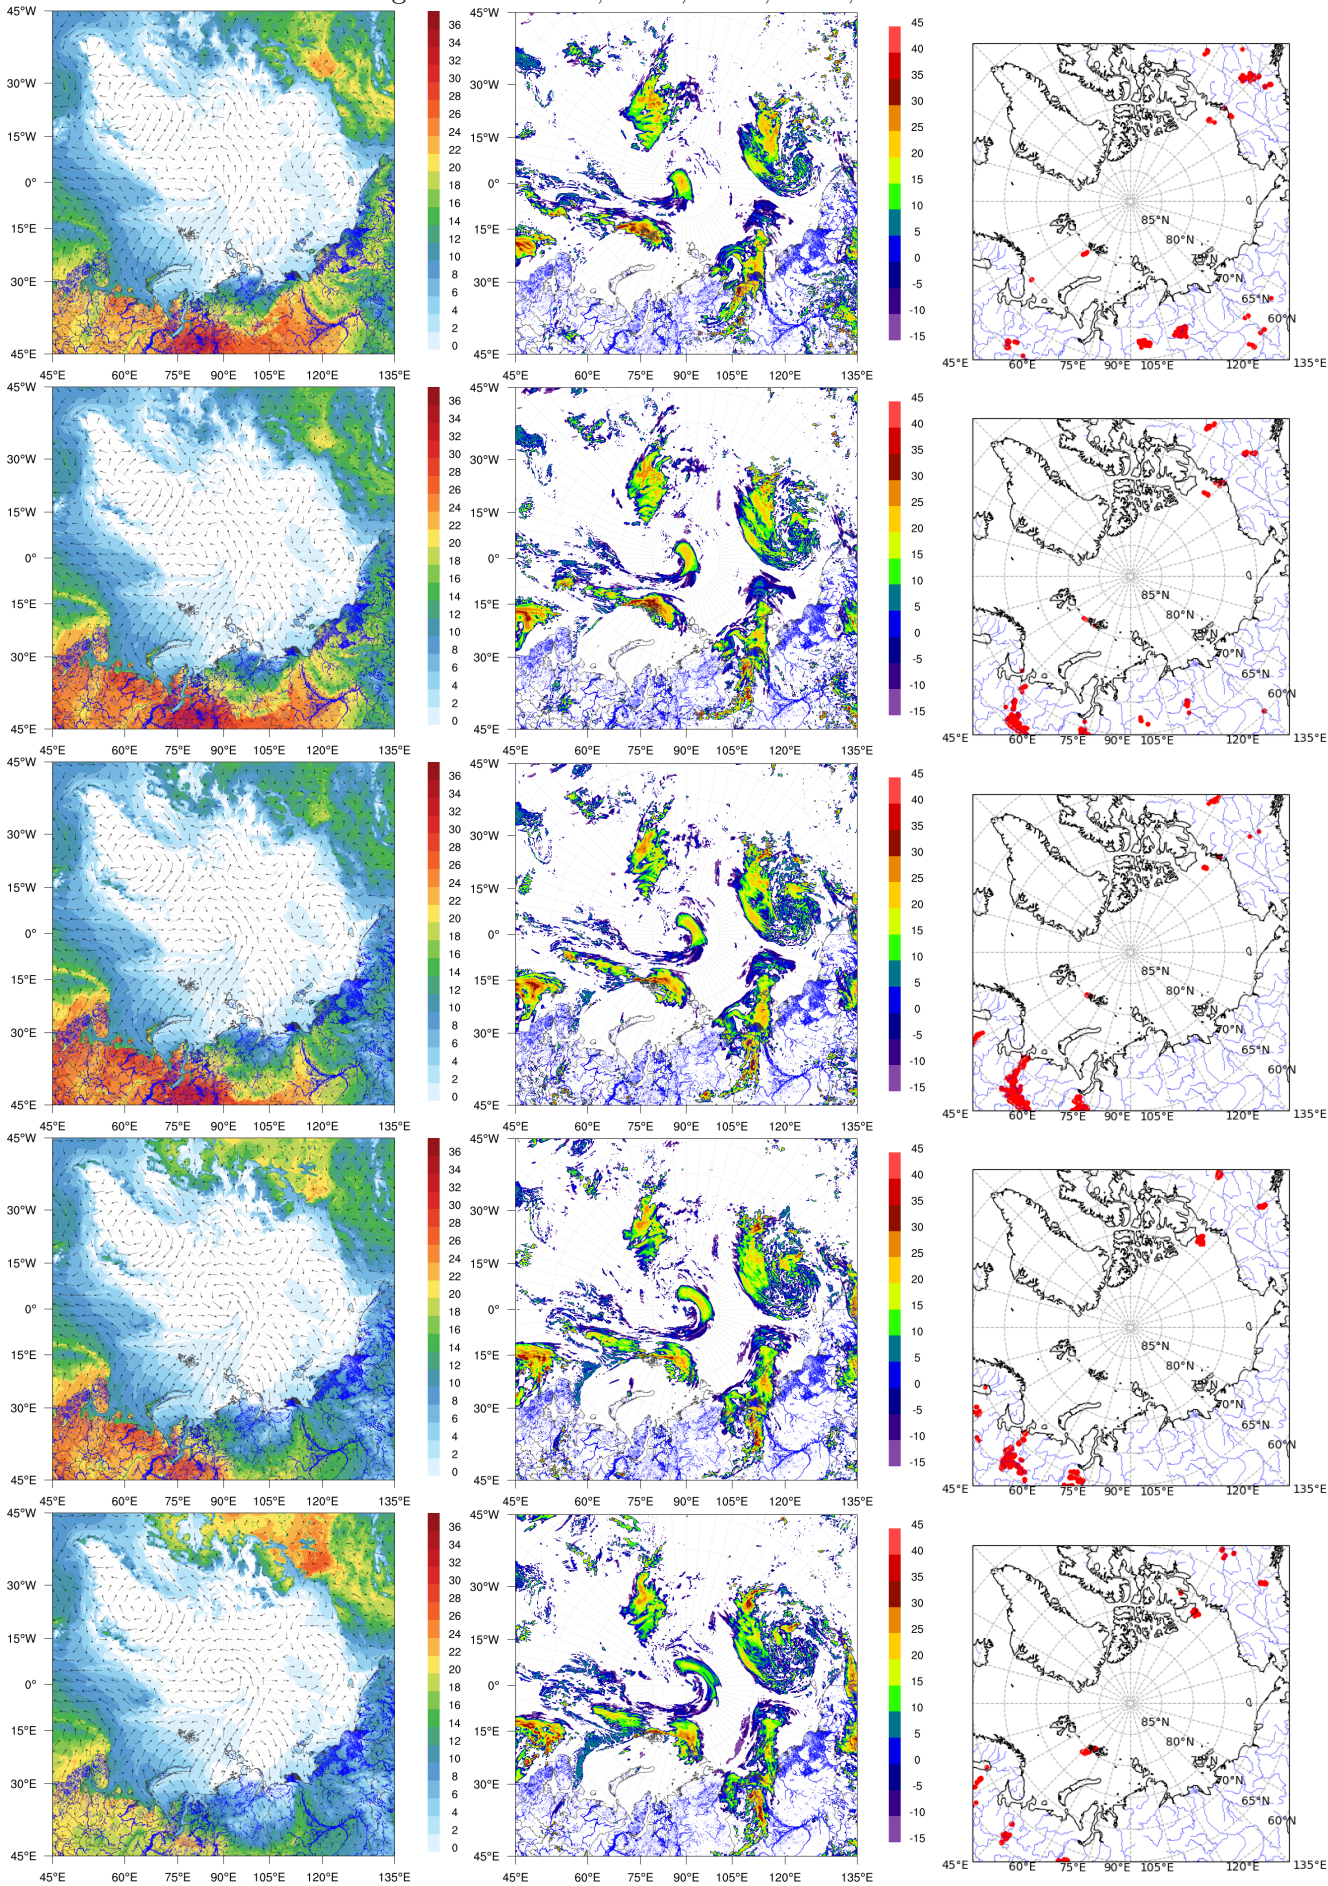



Height of 500 hPa pressure level at 12:00 UTC 2 August 2023. Other moments look quite similar.

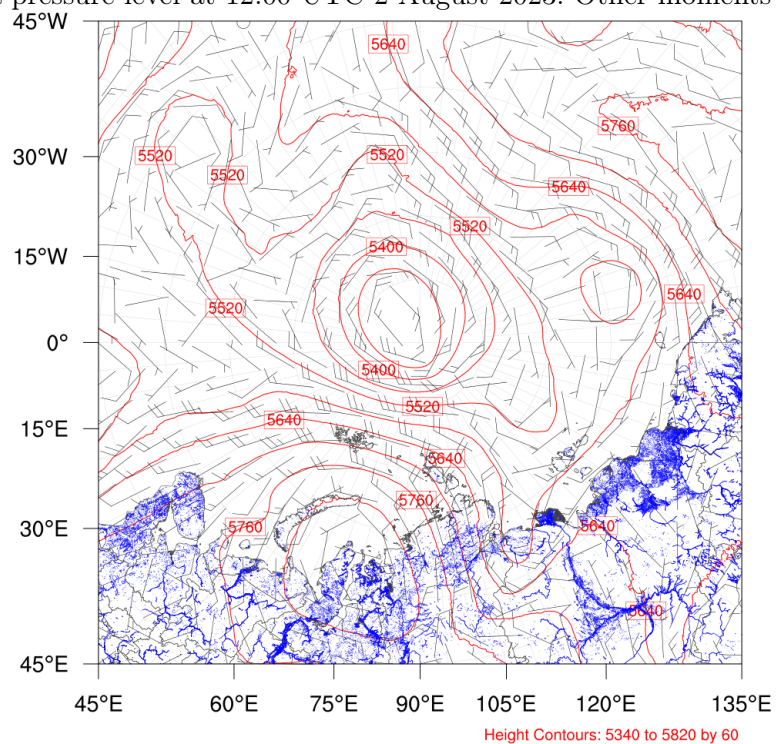



4 August 2023: 06:00, 09:00, 12:00, 15:00 UTC:

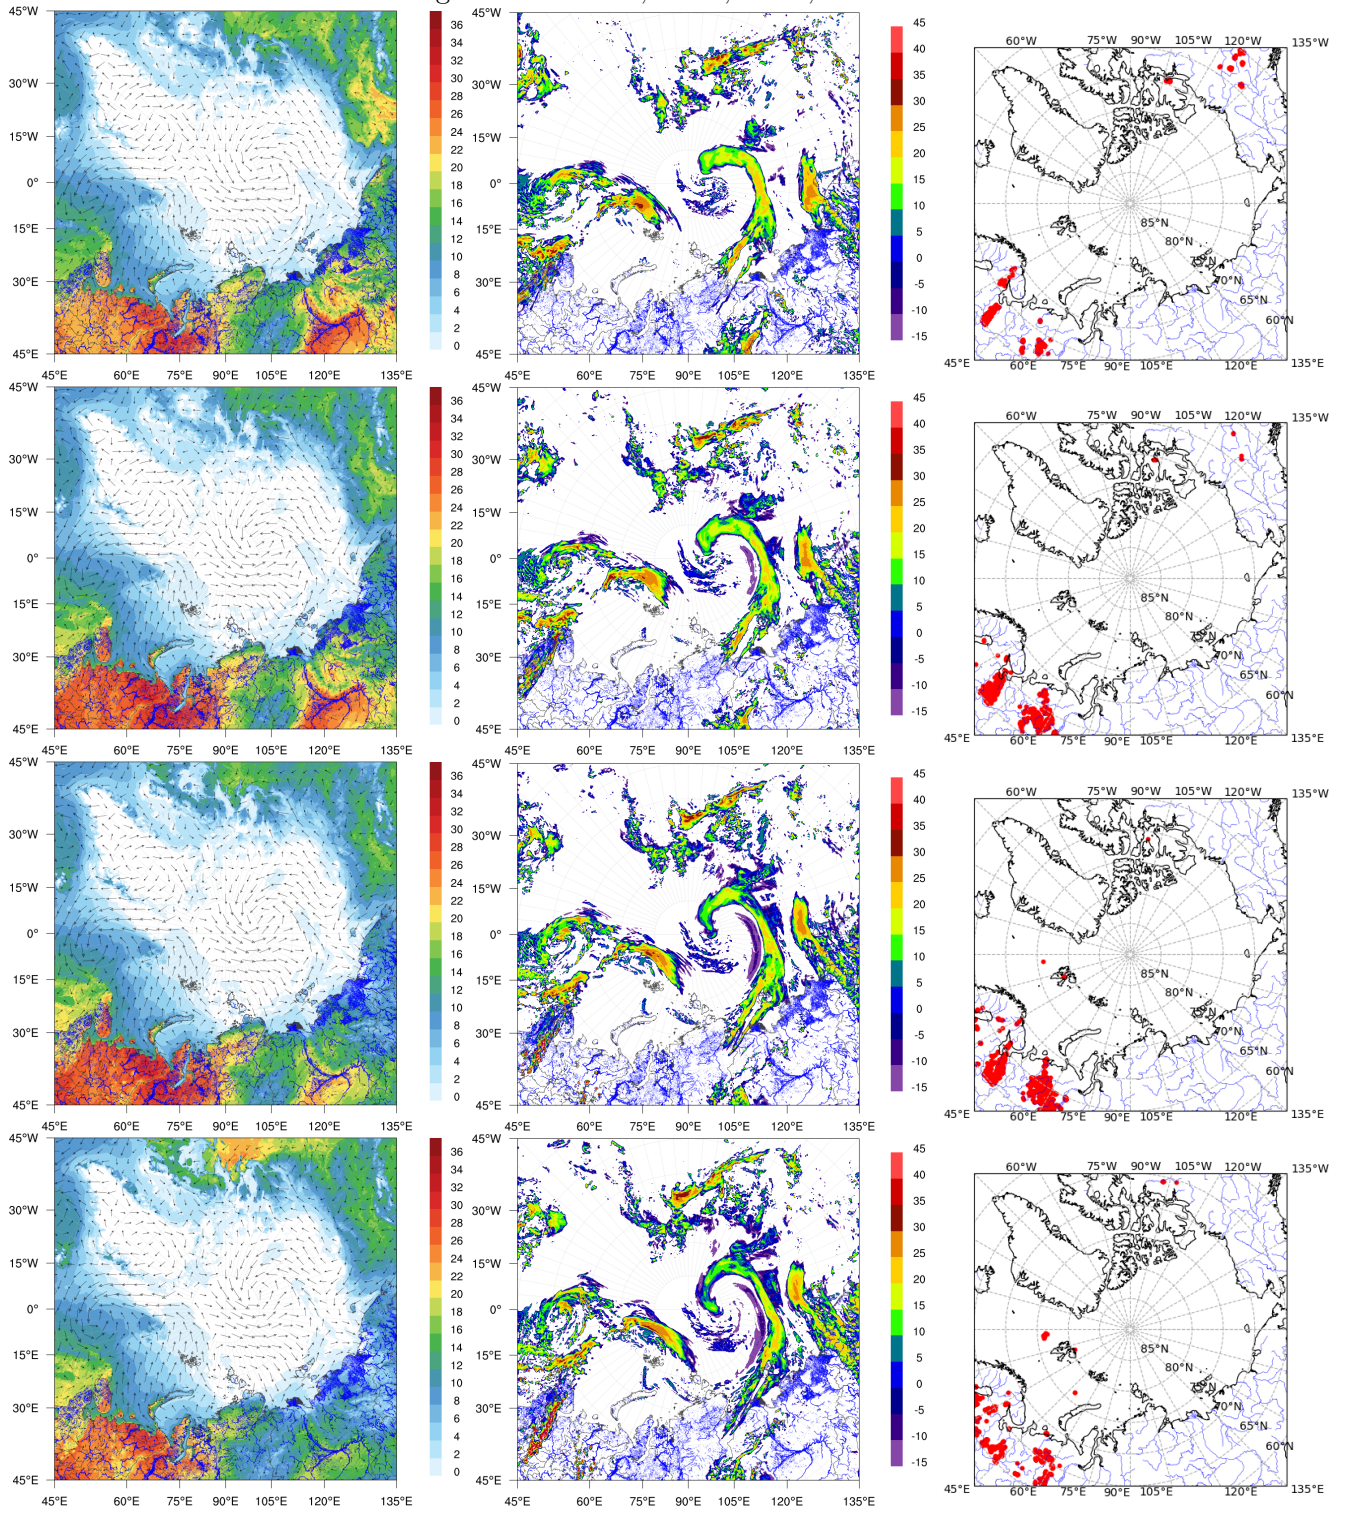

Height of 500 hPa pressure level at 12:00 UTC 4 August 2023. Other moments look quite similar.



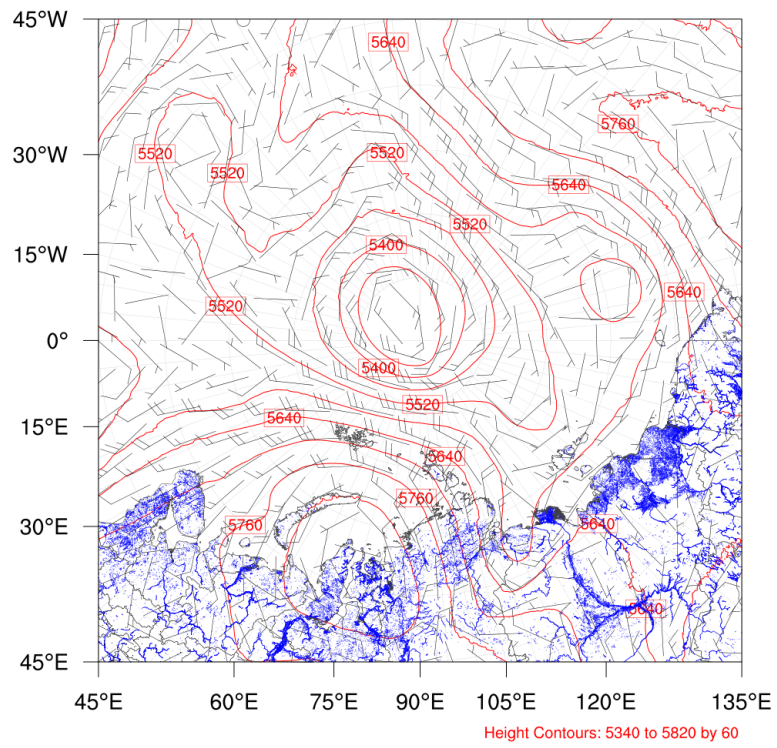



5 August 2023: 06:00, 09:00, 12:00, 15:00 UTC:

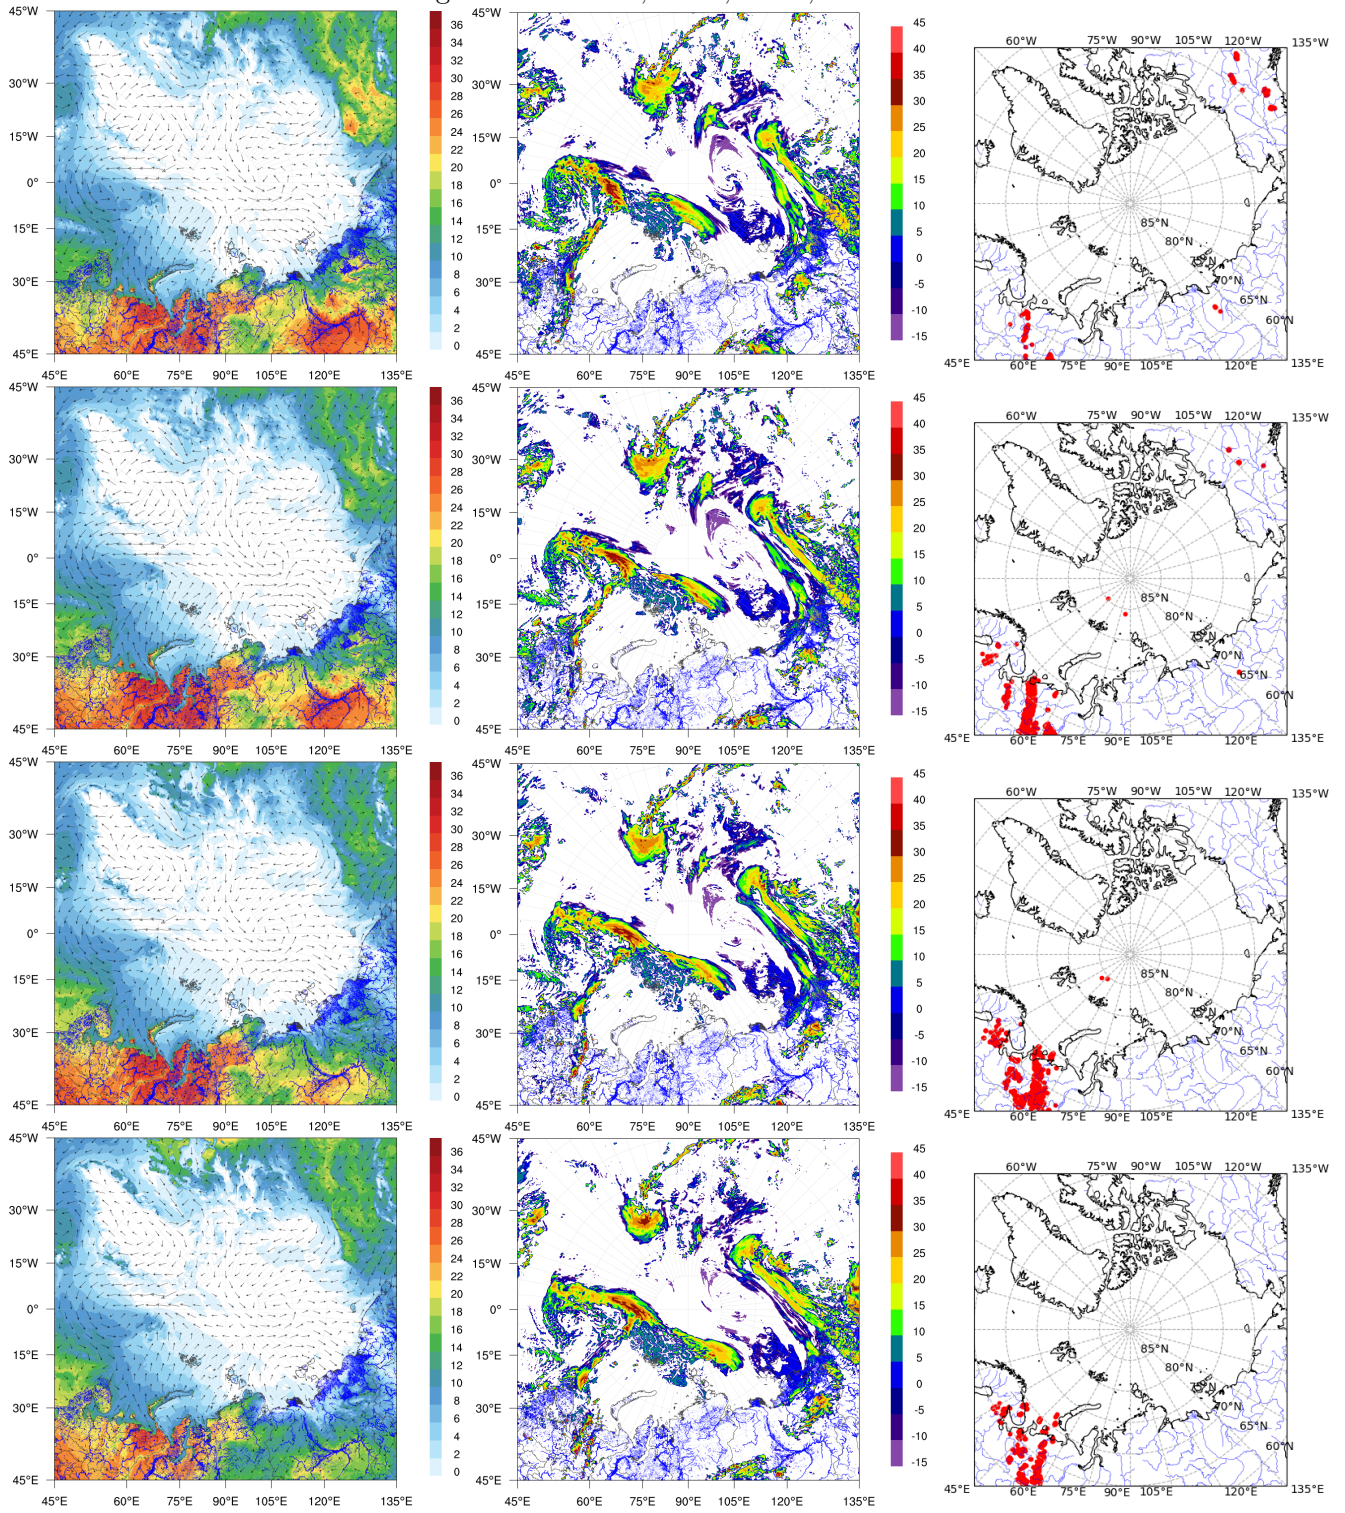

Height of 500 hPa pressure level at 12:00 UTC 5 August 2023. Other moments look quite similar.



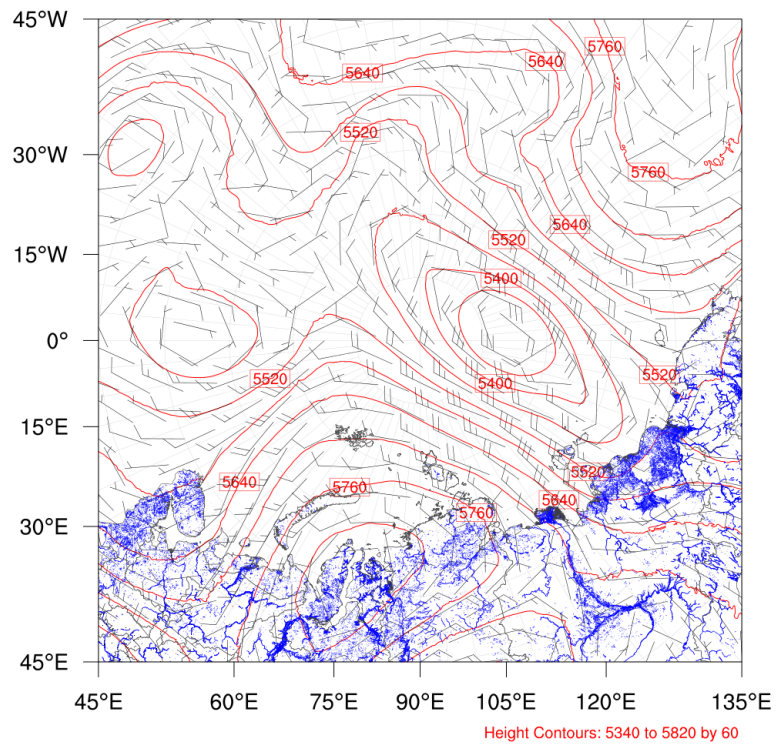



6 August 2023: 06:00, 09:00, 12:00, 15:00 UTC:

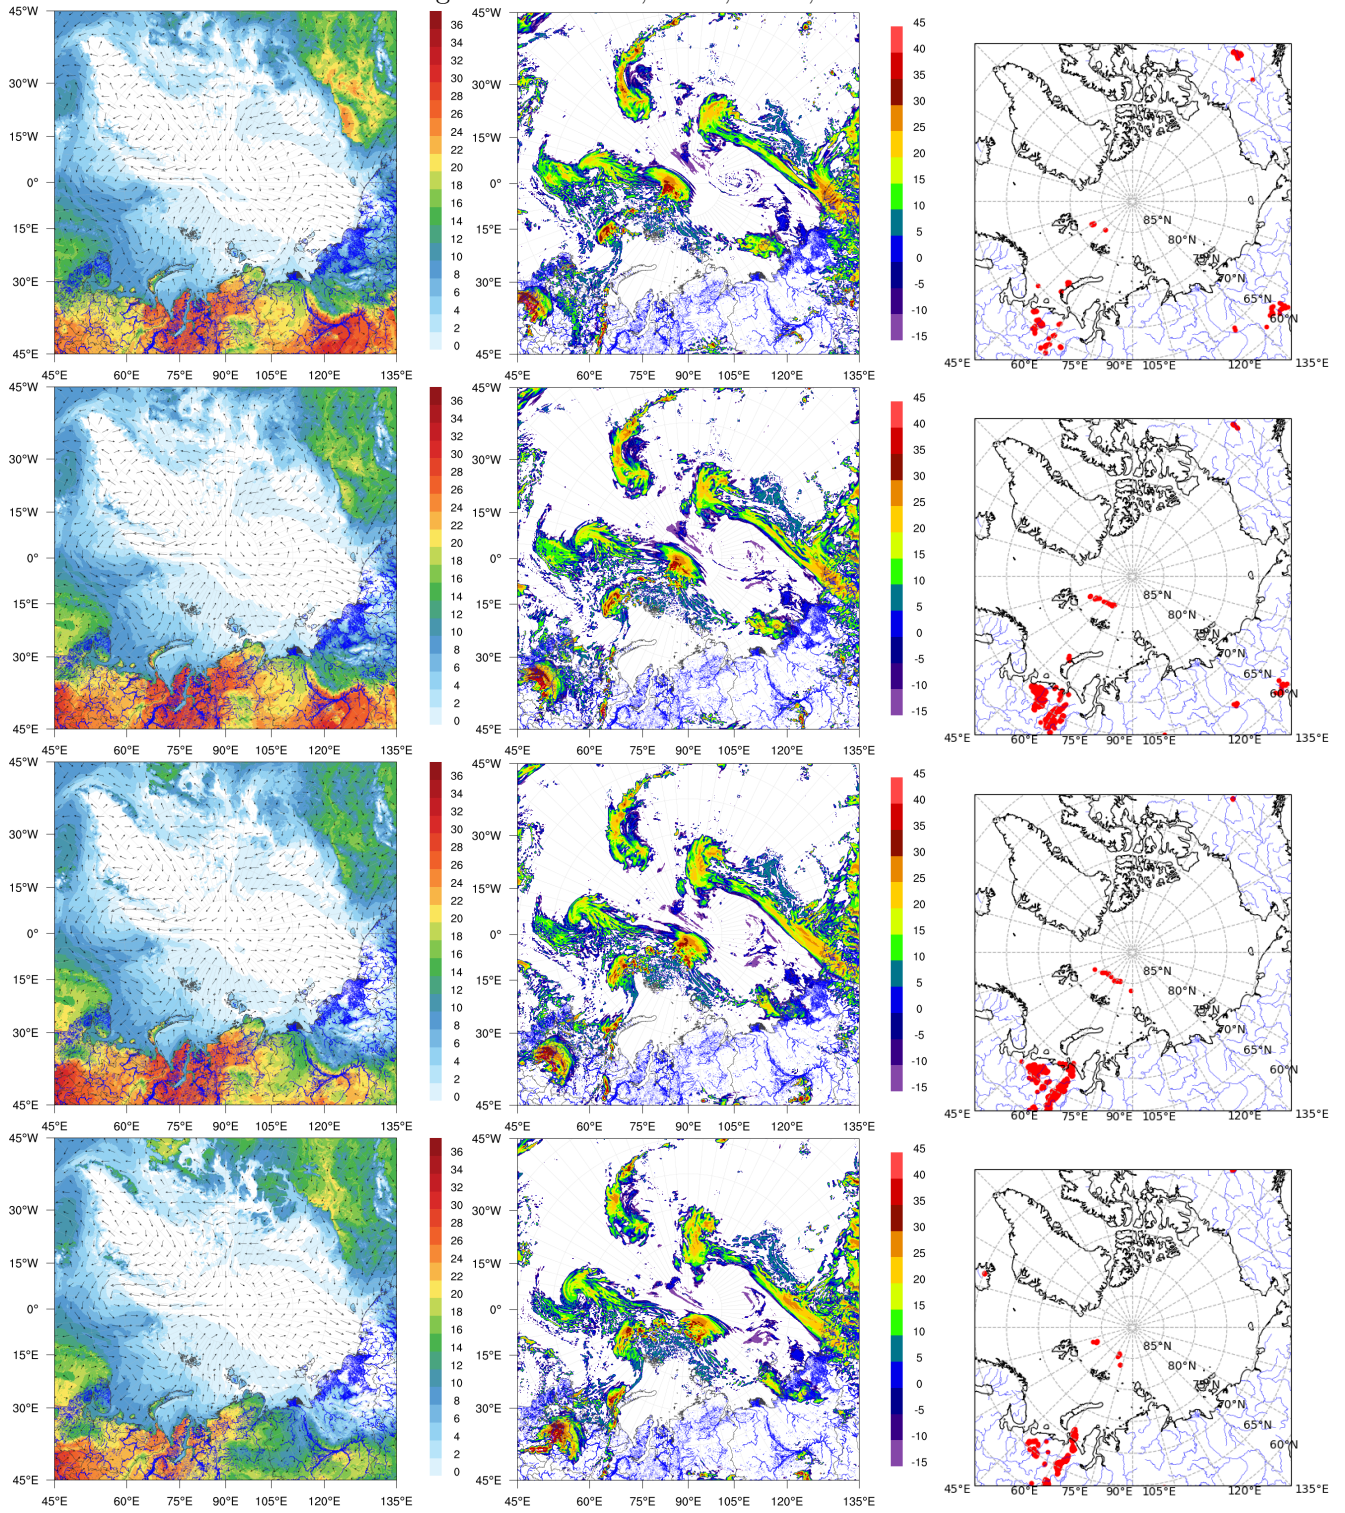

Height of 500 hPa pressure level at 12:00 UTC 6 August 2023. Other moments look quite similar.

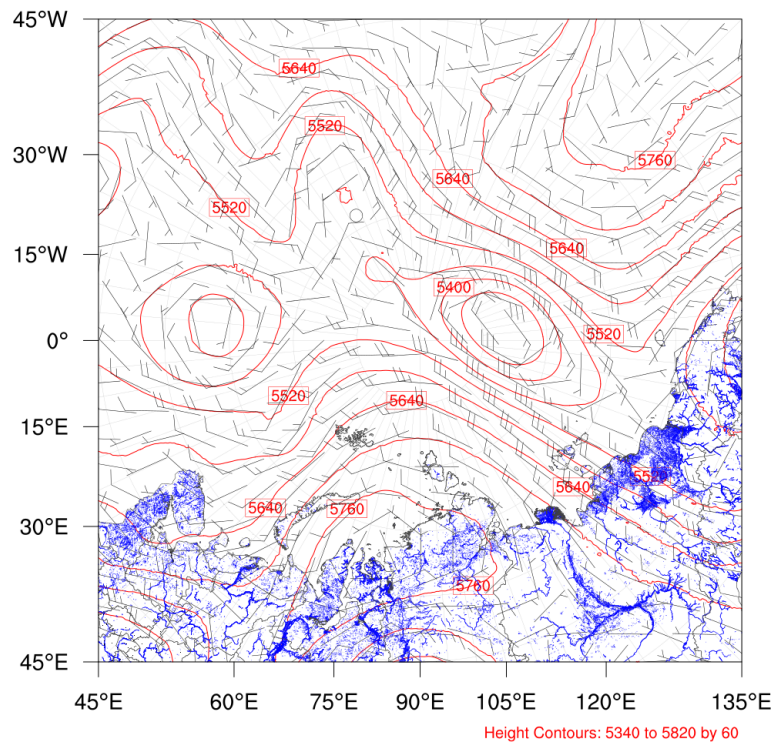

Supplement: s1 [file s1]
